# Supplementary material
Source: Research Square preprint supplement (doi:10.21203/rs.3.rs-9760594/v1)
Supplement: Supplementary file 1 [file 9bb8391a681326de91b32ec7.docx]

**Appendix**

This study was derived from the doctoral thesis prepared by the first author under the supervision of the second author.
