# Supplementary material
Source: Research Square preprint supplement (doi:10.21203/rs.3.rs-9760594/v1)
Supplement: Supplementary file 3 [file fcdce91281780fa3b5617229.docx]

Table 3. Images and video recordings of the grid printing of 29 enriched lor-based formulations from different angles.

| **No** | **Top view** | **Front view** | **Back view** | **45° angel** | **Video** |
| --- | --- | --- | --- | --- | --- |
| **1** | **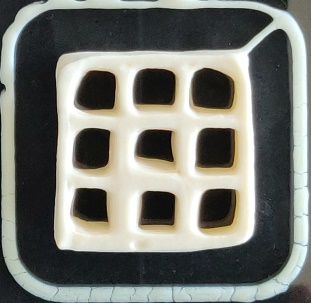** | **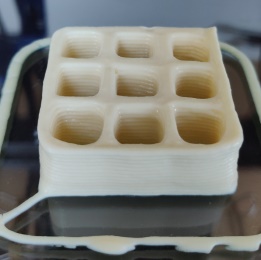** | **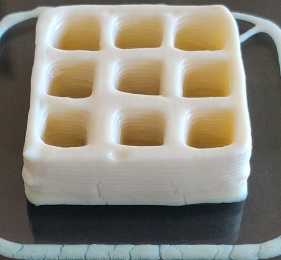** | **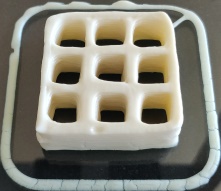** | <https://youtu.be/vGsSOuTotVs> |
| **2** | **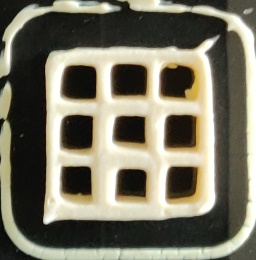** | **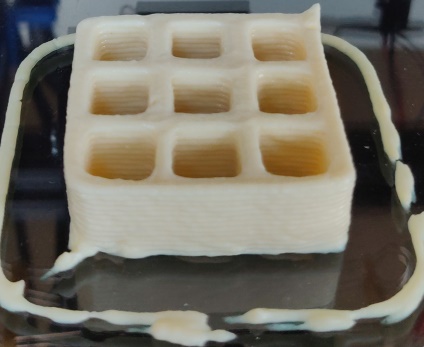** | **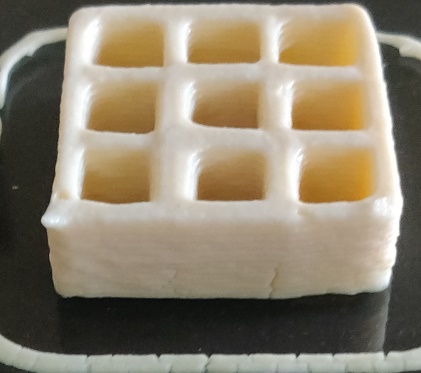** | **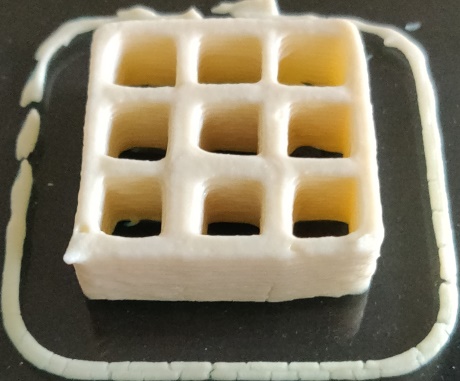** | https://youtu.be/[3h1jQSr7lN4](https://youtu.be/3h1jQSr7lN4) |
| **3** | **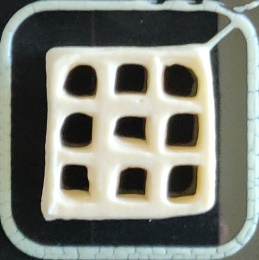** | **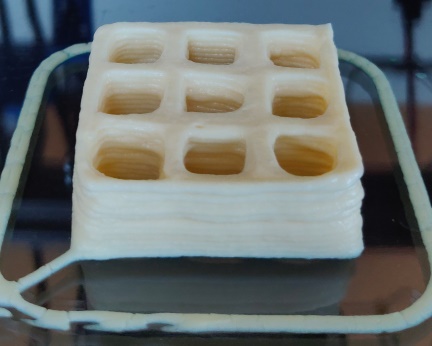** | **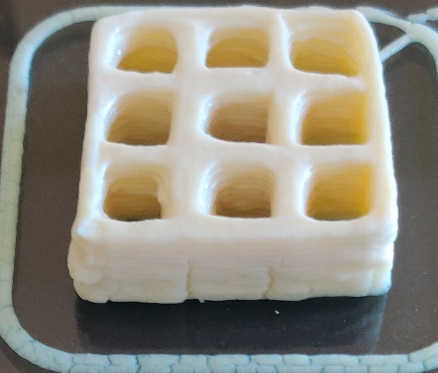** | **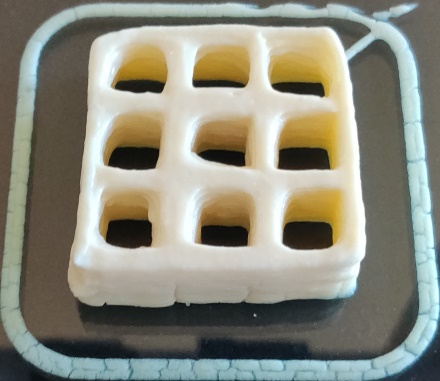** | https://youtu.be/[VyEQZ_a0eaw](https://youtu.be/VyEQZ_a0eaw) |

Table 3. (Continue)

| **No** | **Top view** | **Front view** | **Back view** | **45° angel** | **Video** |
| --- | --- | --- | --- | --- | --- |
| **4** | **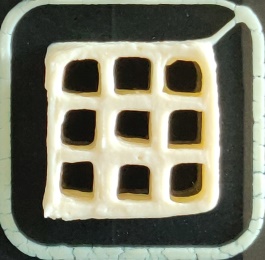** | **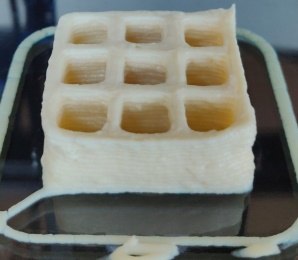** | **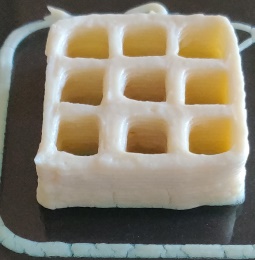** | **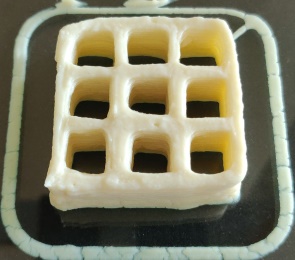** | <https://youtu.be/OmZM8wJAUfQ> |
| **5** | **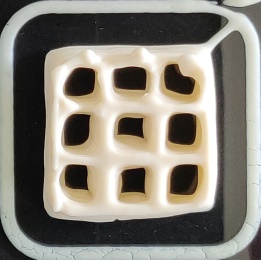** | **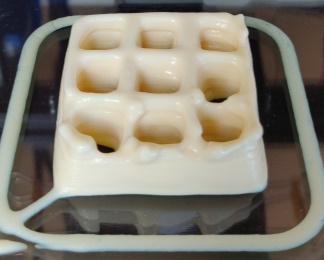** | **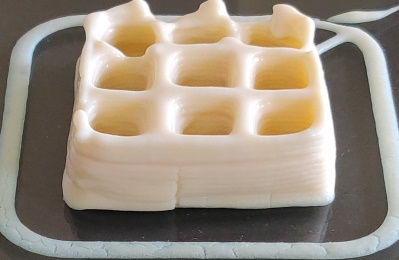** | **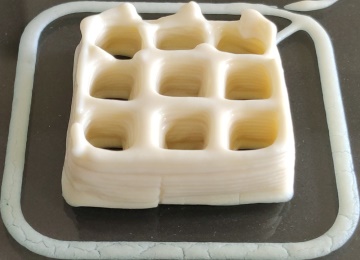** | <https://youtu.be/6Hyghn67Quk> |
| **6** | **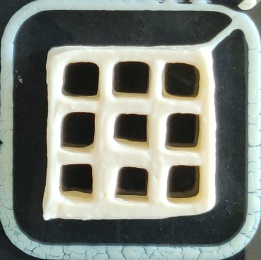** | **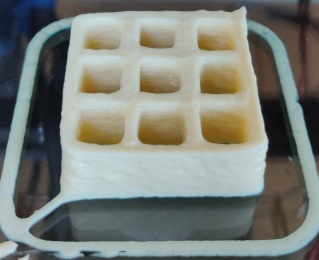** | **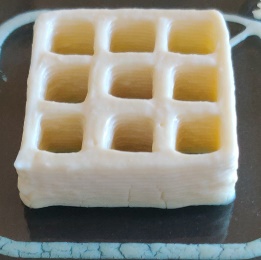** | **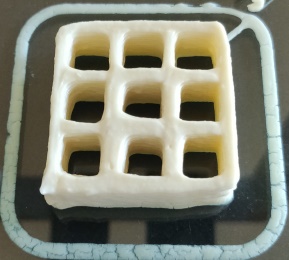** | <https://youtu.be/DAqYyTseHdg> |

Table 3. (Continue)

| **No** | **Top view** | **Front view** | **Back view** | **45° angel** | **Video** |
| --- | --- | --- | --- | --- | --- |
| **7** | **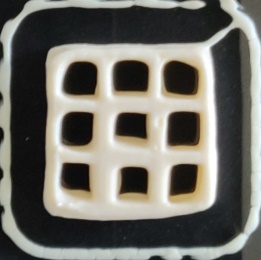** | **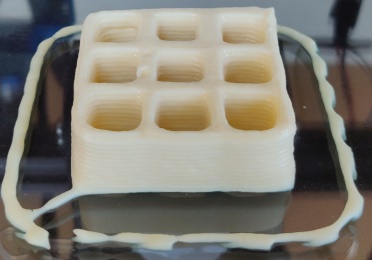** | **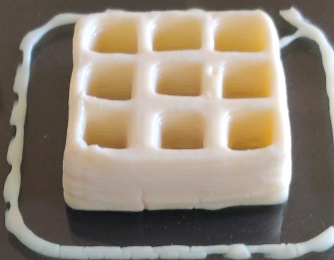** | **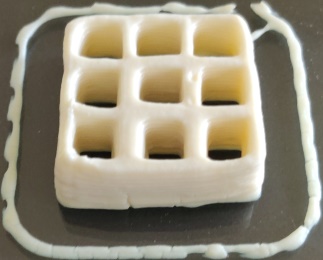** | <https://youtu.be/_YzNbFqvDPA> |
| **8** | **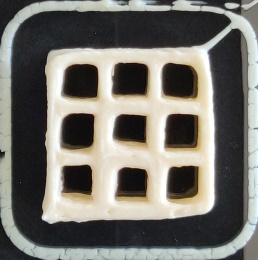** | **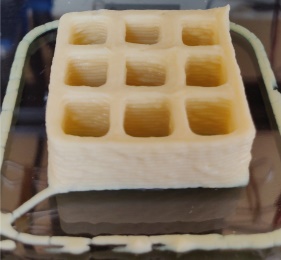** | **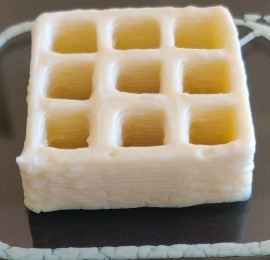** | **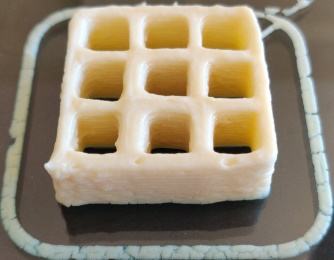** | <https://youtu.be/LeJ45ZdJ_6o> |
| **9** | **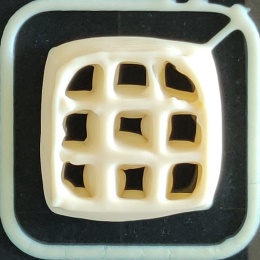** | **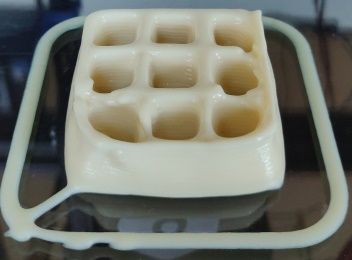** | **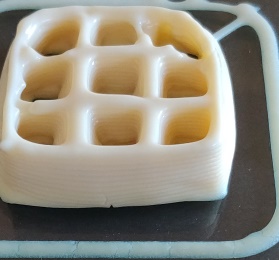** | **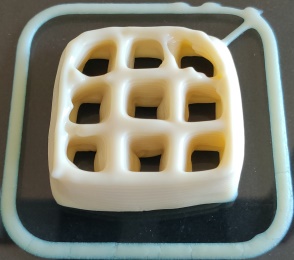** | <https://youtu.be/KYQfPhCzYqM> |

Table 3. (Continue)

| **No** | **Top view** | **Front view** | **Back view** | **45° angel** | **Video** |
| --- | --- | --- | --- | --- | --- |
| **10** | **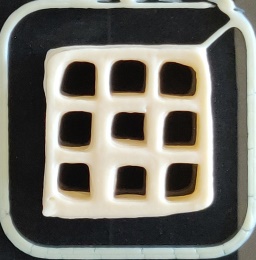** | **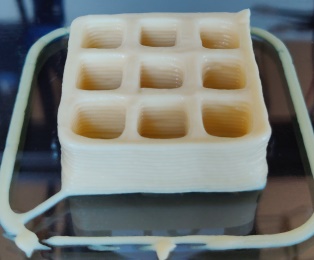** | **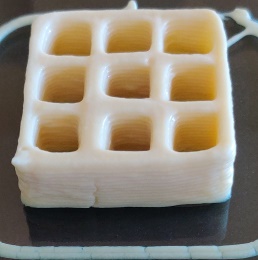** | **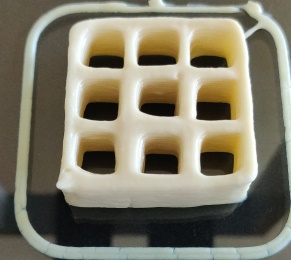** | <https://youtu.be/9Rv3skdwrG8> |
| **11** | **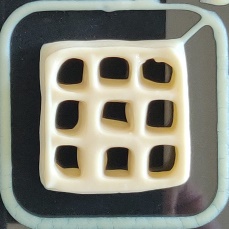** | **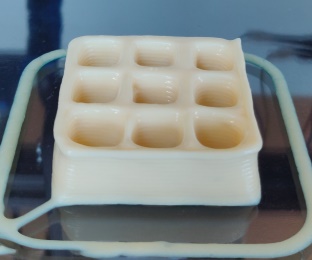** | **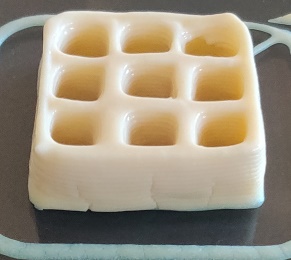** | **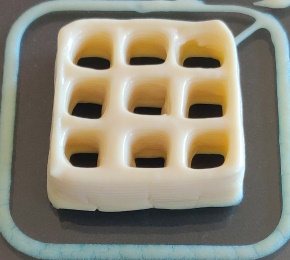** | <https://youtu.be/utNaWE2B36o> |
| **12** | **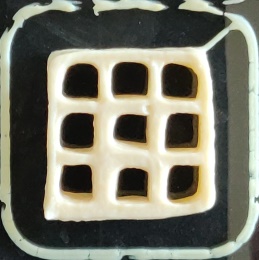** | **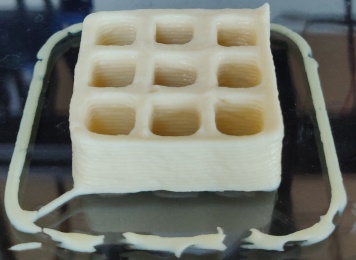** | **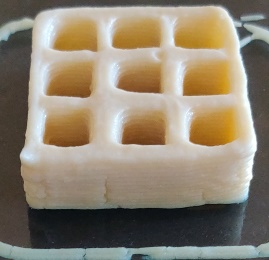** | **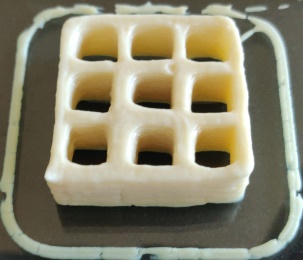** | <https://youtu.be/Pk1_RdtAckI> |

Table 3. (Continue)

| **No** | | **Top view** | | **Front view** | | **Back view** | | **45° angel** | | **Video** | |
| --- | --- | --- | --- | --- | --- | --- | --- | --- | --- | --- | --- |
| **13** | **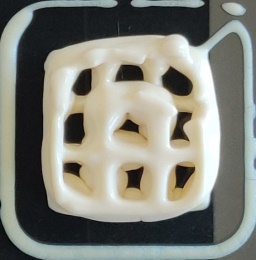** | | **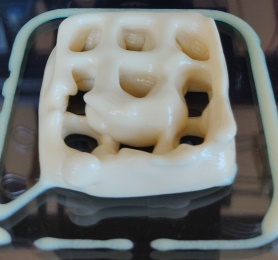** | | **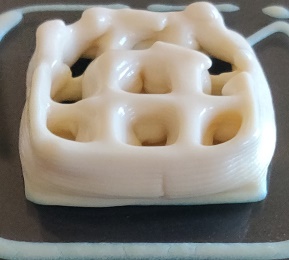** | | **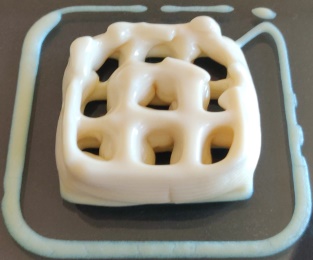** | | <https://youtu.be/6yj9IJ4ee7M> | |
| **14** | **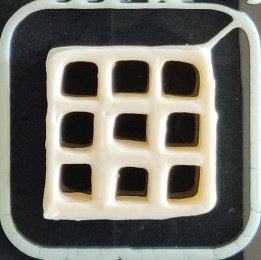** | | **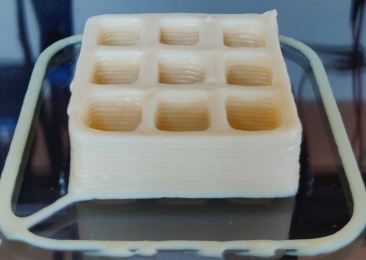** | | **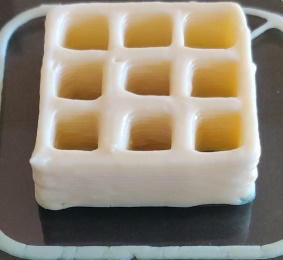** | | **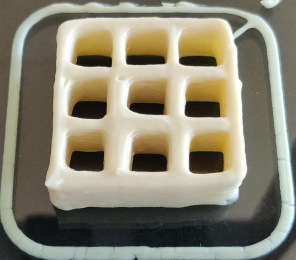** | | <https://youtu.be/2FYhXtn-9Rw> | |
| **15** | **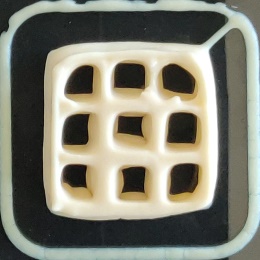** | | **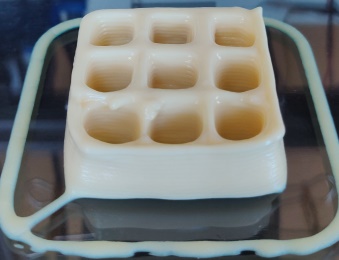** | | **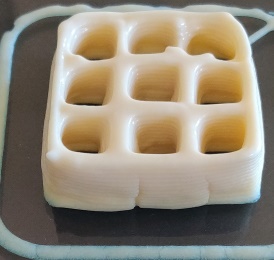** | | **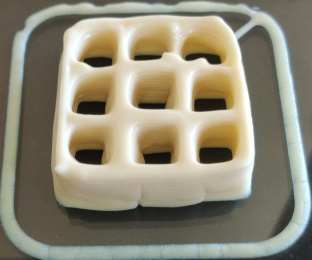** | | <https://youtu.be/9g3zP1_BYtE> | |

Table 3. (Continue)

| **No** | **Top view** | **Front view** | **Back view** | **45° angel** | **Video** |
| --- | --- | --- | --- | --- | --- |
| **16** | **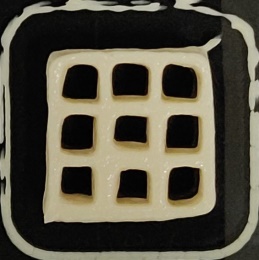** | **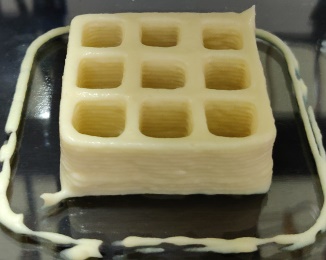** | **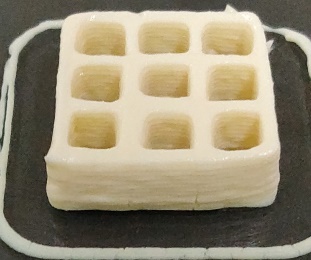** | **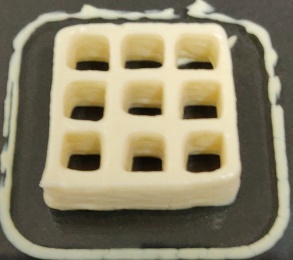** | <https://youtu.be/OCscjB76cRM> |
| **17** | **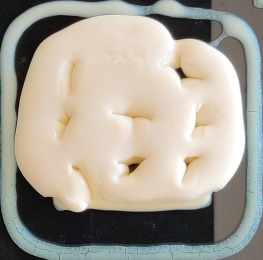** | **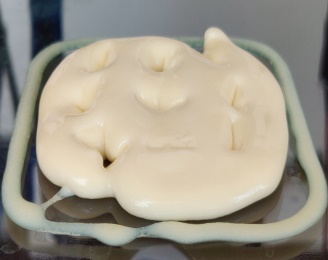** | **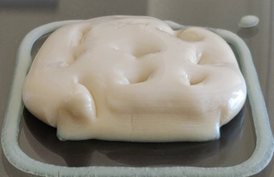** | **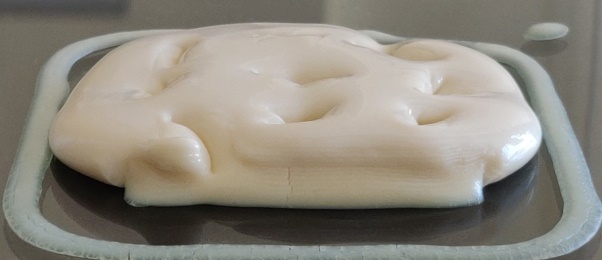** | <https://youtu.be/ypdLZfp9S4A> |
| **18** | **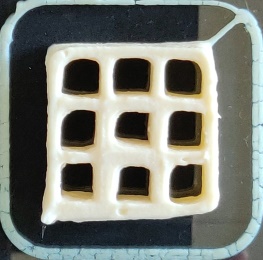** | **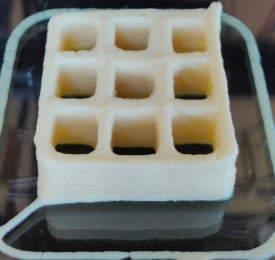** | **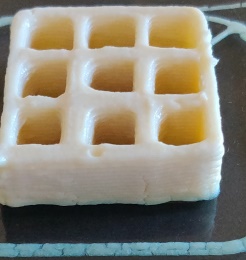** | **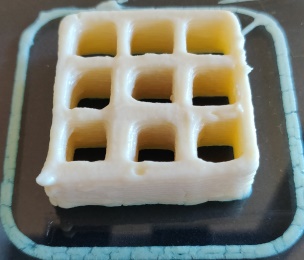** | <https://youtu.be/Bc3ruq5xFI4> |

Table 3. (Continue)

| **No** | **Top view** | **Front view** | **Back view** | **45° angel** | **Video** |
| --- | --- | --- | --- | --- | --- |
| **19** | **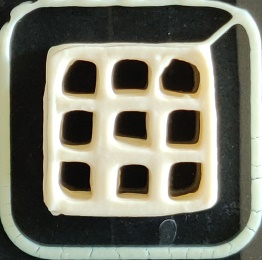** | **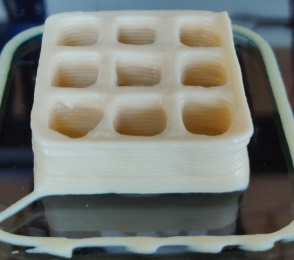** | **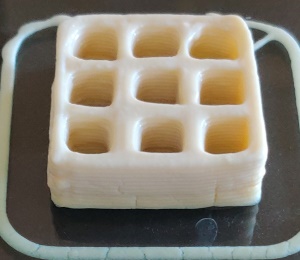** | **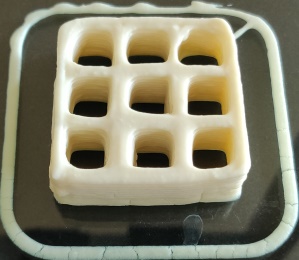** | <https://youtu.be/nUlxTS2UDlU> |
| **20** | **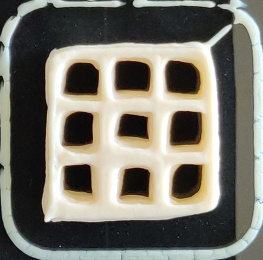** | **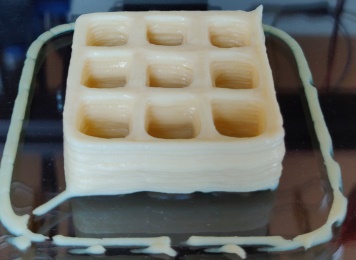** | **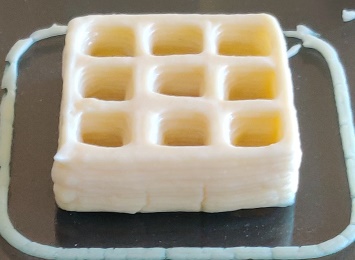** | **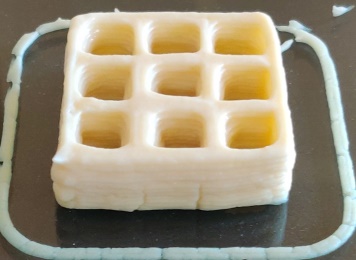** | [https://youtu.be/ rYWYSrODbt0](https://youtu.be/rYWYSrODbt0) |
| **21** | **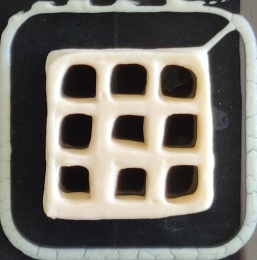** | **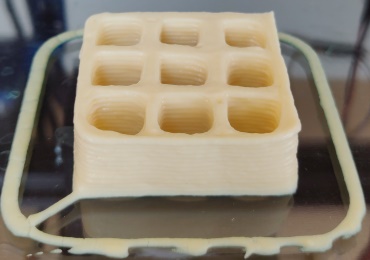** | **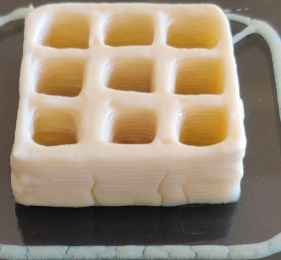** | **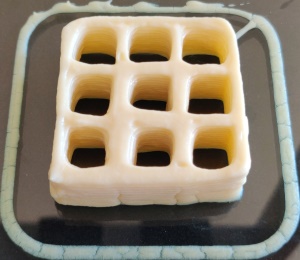** | <https://youtu.be/TBVAkKAhxSY> |

Table 3. (Continue)

| **No** | **Top view** | **Front view** | **Back view** | **45° angel** | **Video** |
| --- | --- | --- | --- | --- | --- |
| **22** | **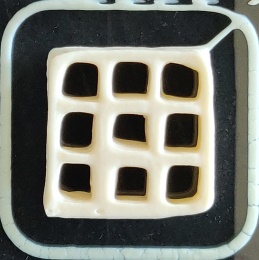** | **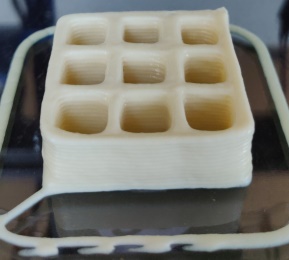** | **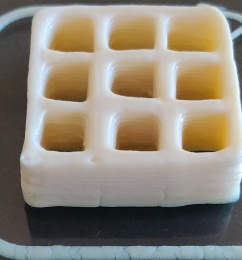** | **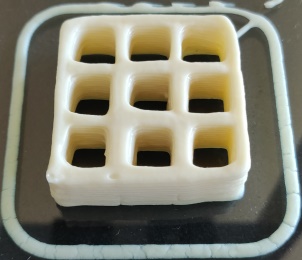** | <https://youtu.be/Tl44lMIhVNk> |
| **23** | **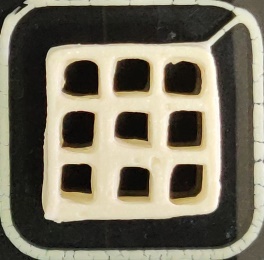** | **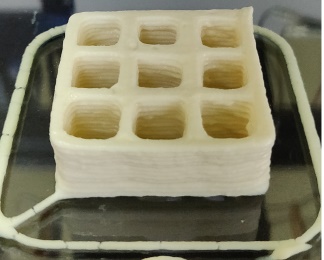** | **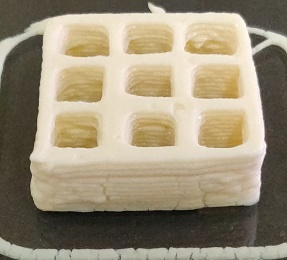** | **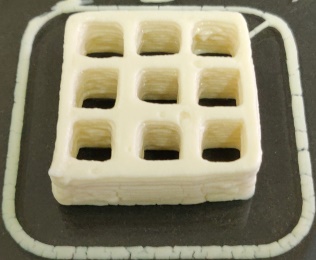** | <https://youtu.be/ZmgoXJjsIUM> |
| **24** | **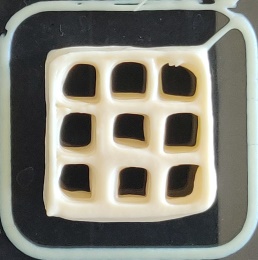** | **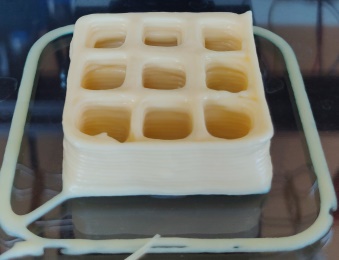** | **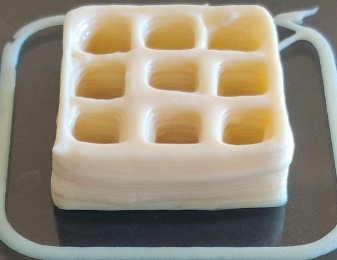** | **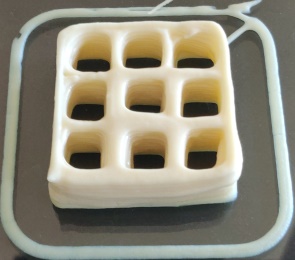** | [https://youtu.be/ fKBgn4KVT-A](https://youtu.be/fKBgn4KVT-A) |

Table 3. (Continue)

| **No** | **Top view** | **Front view** | **Back view** | **45° angel** | **Video** | |
| --- | --- | --- | --- | --- | --- | --- |
| **25** | **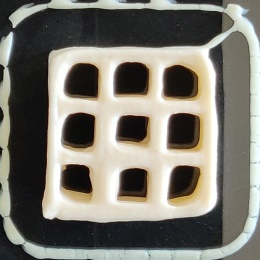** | **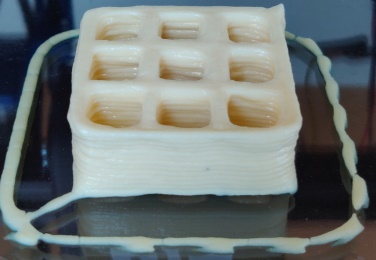** | **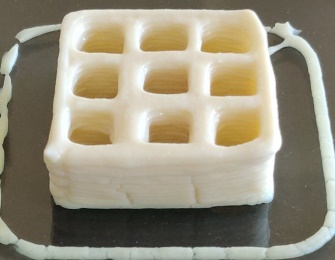** | **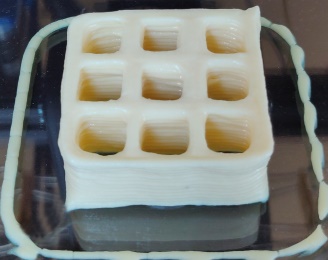** | <https://youtu.be/QDKpL6AvqOU> |
| **26** |  |  |  |  | <https://youtu.be/MtiPknWNWxo> |
| **27** |  |  |  |  | <https://youtu.be/NhZdSKCRWjY> |

Table 3. (Continue)

| **No** | **Top view** | **Front view** | **Back view** | **45° angel** | **Video** |
| --- | --- | --- | --- | --- | --- |
| **28** |  |  |  |  | <https://youtu.be/eWRrwiEsUHo> |
| **29** |  |  |  |  | [https://youtu.be/ iXO07qca7kk](https://youtu.be/iXO07qca7kk) |
