# Supplementary material
Source: Research Square preprint supplement (doi:10.21203/rs.3.rs-9760594/v1)

Table 8. Microstructure images (SN: Sample No)

| SN | 3D Printed Grid | 100 μm, x 100 | 1 μm, x 3000 |
| --- | --- | --- | --- |
| 17 | 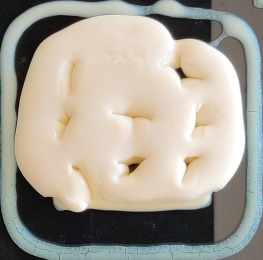 | 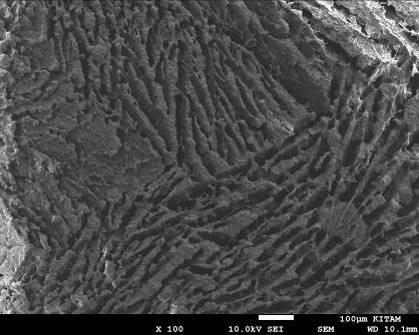 | 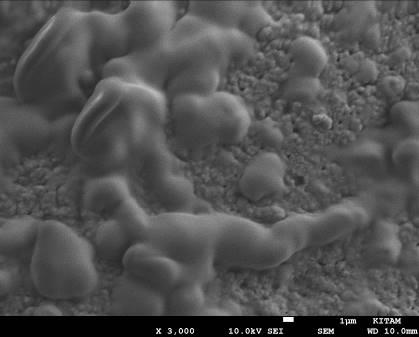 |
| Z | 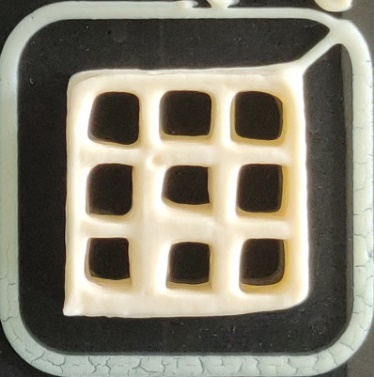 | 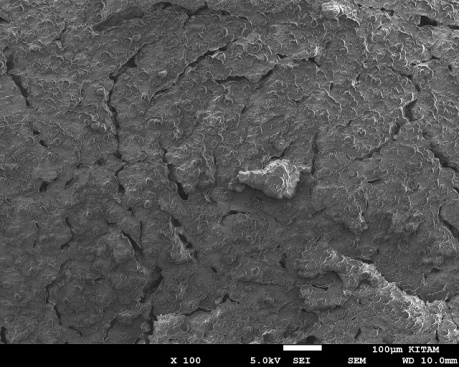 | 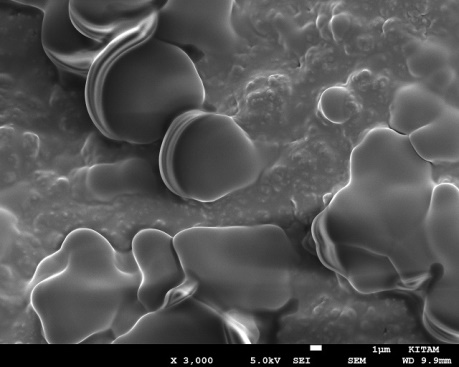 |

Supplement: Supplementary file 2 [file a8094c0a305a7f6bb8d9cd21.docx]
